# Supplementary material for: Antiferromagnetic ordering of the FeBr4− d-spins via strong π–d interaction in a semiconducting EDT-CP-TTFVS·FeBr4 salt
Source: Royal Society of Chemistry journal article supplement (doi:10.1039/b900644c), 2009-01-01
Supplement: b900644c.pdf [file b900644c.pdf]

## Electronic Supporting Information

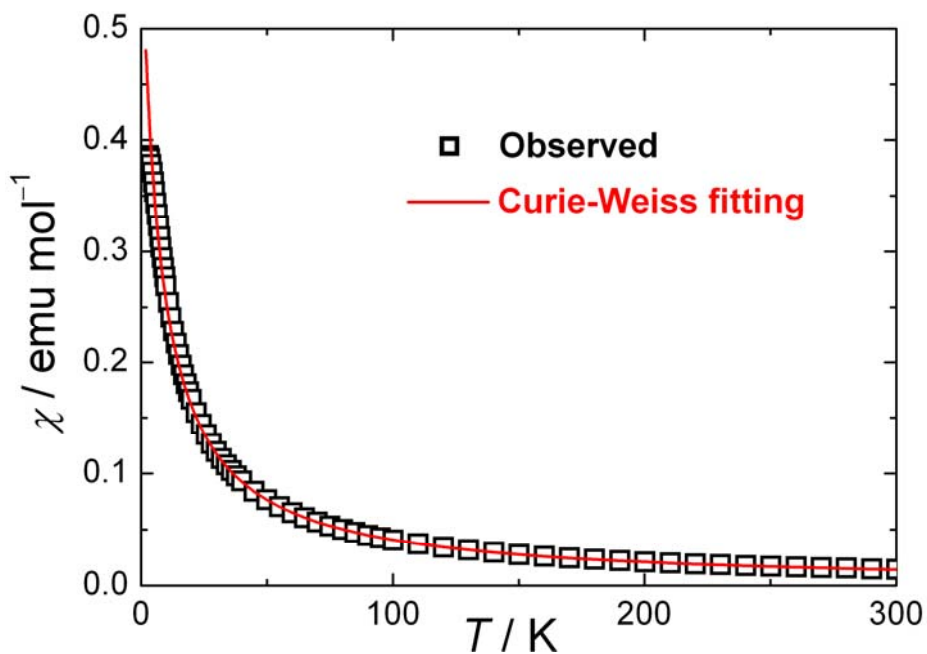

**Fig. S1** Temperature-dependent paramagnetic susceptibility ( $\chi$ , black square) of polycrystals of  $1 \cdot \text{FeCl}_4$ . The red solid line indicates the Curie-Weiss fitting.

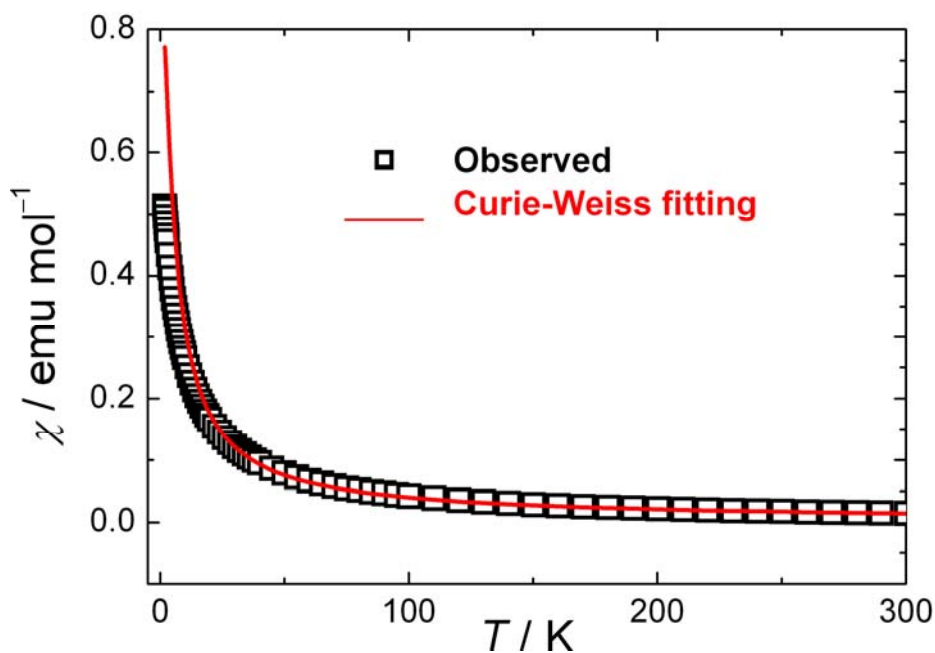

**Fig. S2** Temperature-dependent paramagnetic susceptibility ( $\chi$ , black square) of polycrystals of  $2 \cdot \text{FeCl}_4$ . The red solid line indicates the Curie-Weiss fitting.
